# Supplementary material for: COVID-19 Phenotypes and Comorbidity: A Data-Driven, Pattern Recognition Approach Using National Representative Data from the United States
Source: MDPI journal article supplement (doi:10.3390/ijerph19084630), 2022-04-12
Supplement: s1 [file s1]

## Supplementary Materials

### Logistic probability case scoring

The logistic regression model extracted from August's data was subsequently used to score subsequent cases per month. Let us consider a model where  $x_1, x_2, \dots, x_n$  are symptoms (used as predictors) of the binary response variable  $C$  (1=COVID-19 positive, 0=COVID-19 negative), which represents COVID-19 status. The log-odds  $\lambda$  of the probability  $p$  of  $C=1$  can be presented as follows:

$$\lambda = \ln\left(\frac{p}{1-p}\right) = b_0 + b_1x_1 + b_2x_2 + \dots + b_nx_n, \quad 0 < p < 1 \quad (S1)$$

where  $b_1, b_2, \dots, b_n$  are the model parameters,  $b_0$  is the constant and  $1-p$  is the probability of  $C=0$ . The exponent of  $\lambda$  retrieves the odds for each case:

$$\frac{p}{1-p} = e^{b_0+b_1x_1+b_2x_2+\dots+b_nx_n}, \quad 0 < p < 1 \quad (S2)$$

where  $e$  is Napier's number. The probability  $p$  can then be expressed as follows:

$$p = \frac{e^{b_0+b_1x_1+b_2x_2+\dots+b_nx_n}}{1 + e^{b_0+b_1x_1+b_2x_2+\dots+b_nx_n}}, \quad 0 < p < 1 \quad (S3)$$

To generate our model, we calculate each  $b_i$ , where  $i \in [1 \dots n]$  for each variable  $x_i$  where  $i \in [1 \dots n]$ . For each predictor (i.e., symptom)  $x_i$ , the odds ratio calculated by logistic regression (i.e. the exponent of  $b_i$ ) is used as a corresponding weight in a subsequent multiple correspondence analysis. Finally, the probability  $p$  is used to score each case.

### Decision Trees via Quest

QUEST was originally proposed by Loh and Shih [22]. Let us consider cluster (i.e. phenotype) membership as a dependent nominal variable  $Y$  with  $J$  classes (equal to the number of phenotypes), and each symptom as a categorical (nominal) predictor  $X$ .

The decision tree expands by testing for the best predictors among the input,

For each categorical predictor  $X$ , QUEST performs a chi-square test of independence at each node  $n$ , subsequently calculating the corresponding p-value:

$$p_x = \Pr(\chi_d^2 > X^2) \quad (S4)$$

where  $d$  represents the degrees of freedom for  $\chi_d^2$ , for a predictor  $X$  with  $K_n$  categories:

$$d = (J_n - 1)(K_n - 1) \quad (S5)$$

The growth procedure depends on establishing the best splitting predictor at each node based on the smallest p-value. Conversely, the "stopping" process is determined by several stopping criteria. In our study, the applied criterion was node purity, i.e. the complete separation of a predictor variable on a dependent variable class.
